# Supplementary material for: Using regularization and second order information in outer approximation for convex MINLP
Source: Springer Nature journal article supplement (doi:10.1007/s10107-018-1356-3), 2018-12-17
Supplement: 10107_2018_1356_MOESM1_ESM.pdf [file 10107_2018_1356_MOESM1_ESM.pdf]

## 1 Supplemental material

The supplemental material contains more details regarding the test set used in the numerical comparison as well as detailed results showing how each method performed for each individual test problem.

## 2 Test set

The main properties of the test problems are shown in Table 1, showing the number of integer variables  $m^{int}$ , binary variables  $m^{bin}$ , continuous variables  $n$ , and total variables  $n + m$ . The table also shows the number of constraints, the number of nonlinear functions, *i.e.*, nonlinear objective function and constraint functions, and the ratio between number of variables present in a nonlinear term and the total of variables  $\frac{n_{nonlin}}{n+m}$ .

Table 1: List of instances in convex MINLP test set.

| Instance              | $m^{int}$ | $m^{bin}$ | $n$  | $n + m$ | ncons | nnlfunc | $\frac{n_{nonlin}}{n+m}$ |
|-----------------------|-----------|-----------|------|---------|-------|---------|--------------------------|
| cvxnonsep_normcon40   | 20        | 0         | 20   | 40      | 1     | 1       | 1                        |
| cvxnonsep_nsig40      | 20        | 0         | 20   | 40      | 1     | 1       | 1                        |
| cvxnonsep_pcon40      | 20        | 0         | 20   | 40      | 1     | 1       | 1                        |
| cvxnonsep_psig40      | 20        | 0         | 20   | 40      | 0     | 1       | 1                        |
| cvxnonsep_normcon30   | 15        | 0         | 15   | 30      | 1     | 1       | 1                        |
| cvxnonsep_nsig30      | 15        | 0         | 15   | 30      | 1     | 1       | 1                        |
| cvxnonsep_pcon30      | 15        | 0         | 15   | 30      | 1     | 1       | 1                        |
| cvxnonsep_psig30      | 15        | 0         | 15   | 30      | 0     | 1       | 1                        |
| cvxnonsep_normcon20   | 10        | 0         | 10   | 20      | 1     | 1       | 1                        |
| cvxnonsep_nsig20      | 10        | 0         | 10   | 20      | 1     | 1       | 1                        |
| cvxnonsep_pcon20      | 10        | 0         | 10   | 20      | 1     | 1       | 1                        |
| cvxnonsep_psig20      | 10        | 0         | 10   | 20      | 0     | 1       | 1                        |
| du-opt                | 13        | 0         | 7    | 20      | 9     | 1       | 1                        |
| du-opt5               | 13        | 0         | 7    | 20      | 9     | 1       | 1                        |
| ex1223b               | 0         | 4         | 3    | 7       | 9     | 5       | 1                        |
| ibs2                  | 0         | 1500      | 1510 | 3010    | 1821  | 10      | 0.996678                 |
| squff030-150          | 0         | 30        | 4500 | 4530    | 4650  | 1       | 0.993377                 |
| squff020-150          | 0         | 20        | 3000 | 3020    | 3150  | 1       | 0.993377                 |
| smallinvSNPr1b010-011 | 100       | 0         | 1    | 101     | 4     | 1       | 0.990099                 |
| smallinvSNPr1b020-022 | 100       | 0         | 1    | 101     | 4     | 1       | 0.990099                 |
| smallinvSNPr1b050-055 | 100       | 0         | 1    | 101     | 4     | 1       | 0.990099                 |
| smallinvSNPr1b100-110 | 100       | 0         | 1    | 101     | 4     | 1       | 0.990099                 |
| smallinvSNPr1b150-165 | 100       | 0         | 1    | 101     | 4     | 1       | 0.990099                 |
| smallinvSNPr1b200-220 | 100       | 0         | 1    | 101     | 4     | 1       | 0.990099                 |
| smallinvSNPr2b010-011 | 100       | 0         | 1    | 101     | 4     | 1       | 0.990099                 |
| smallinvSNPr2b020-022 | 100       | 0         | 1    | 101     | 4     | 1       | 0.990099                 |
| smallinvSNPr2b050-055 | 100       | 0         | 1    | 101     | 4     | 1       | 0.990099                 |

---

|                       |     |    |      |      |      |   |          |
|-----------------------|-----|----|------|------|------|---|----------|
| smallinvSNPr2b100-110 | 100 | 0  | 1    | 101  | 4    | 1 | 0.990099 |
| smallinvSNPr2b150-165 | 100 | 0  | 1    | 101  | 4    | 1 | 0.990099 |
| smallinvSNPr2b200-220 | 100 | 0  | 1    | 101  | 4    | 1 | 0.990099 |
| smallinvSNPr3b010-011 | 100 | 0  | 1    | 101  | 4    | 1 | 0.990099 |
| smallinvSNPr3b020-022 | 100 | 0  | 1    | 101  | 4    | 1 | 0.990099 |
| smallinvSNPr3b050-055 | 100 | 0  | 1    | 101  | 4    | 1 | 0.990099 |
| smallinvSNPr3b100-110 | 100 | 0  | 1    | 101  | 4    | 1 | 0.990099 |
| smallinvSNPr3b150-165 | 100 | 0  | 1    | 101  | 4    | 1 | 0.990099 |
| smallinvSNPr3b200-220 | 100 | 0  | 1    | 101  | 4    | 1 | 0.990099 |
| smallinvSNPr4b010-011 | 100 | 0  | 1    | 101  | 4    | 1 | 0.990099 |
| smallinvSNPr4b020-022 | 100 | 0  | 1    | 101  | 4    | 1 | 0.990099 |
| smallinvSNPr4b050-055 | 100 | 0  | 1    | 101  | 4    | 1 | 0.990099 |
| smallinvSNPr4b100-110 | 100 | 0  | 1    | 101  | 4    | 1 | 0.990099 |
| smallinvSNPr4b150-165 | 100 | 0  | 1    | 101  | 4    | 1 | 0.990099 |
| smallinvSNPr4b200-220 | 100 | 0  | 1    | 101  | 4    | 1 | 0.990099 |
| smallinvSNPr5b010-011 | 100 | 0  | 1    | 101  | 4    | 1 | 0.990099 |
| smallinvSNPr5b020-022 | 100 | 0  | 1    | 101  | 4    | 1 | 0.990099 |
| smallinvSNPr5b050-055 | 100 | 0  | 1    | 101  | 4    | 1 | 0.990099 |
| smallinvSNPr5b100-110 | 100 | 0  | 1    | 101  | 4    | 1 | 0.990099 |
| smallinvSNPr5b150-165 | 100 | 0  | 1    | 101  | 4    | 1 | 0.990099 |
| smallinvSNPr5b200-220 | 100 | 0  | 1    | 101  | 4    | 1 | 0.990099 |
| squff030-100          | 0   | 30 | 3000 | 3030 | 3100 | 1 | 0.990099 |
| squff040-080          | 0   | 40 | 3200 | 3240 | 3280 | 1 | 0.987654 |
| squff015-080          | 0   | 15 | 1200 | 1215 | 1280 | 1 | 0.987654 |
| squff010-080          | 0   | 10 | 800  | 810  | 880  | 1 | 0.987654 |
| squff015-060          | 0   | 15 | 900  | 915  | 960  | 1 | 0.983607 |
| squff020-050          | 0   | 20 | 1000 | 1020 | 1050 | 1 | 0.980392 |
| squff025-040          | 0   | 25 | 1000 | 1025 | 1040 | 1 | 0.97561  |
| squff020-040          | 0   | 20 | 800  | 820  | 840  | 1 | 0.97561  |
| squff010-040          | 0   | 10 | 400  | 410  | 440  | 1 | 0.97561  |
| smallinvDAXr1b010-011 | 30  | 0  | 1    | 31   | 4    | 1 | 0.967742 |
| smallinvDAXr1b020-022 | 30  | 0  | 1    | 31   | 4    | 1 | 0.967742 |
| smallinvDAXr1b050-055 | 30  | 0  | 1    | 31   | 4    | 1 | 0.967742 |
| smallinvDAXr1b100-110 | 30  | 0  | 1    | 31   | 4    | 1 | 0.967742 |
| smallinvDAXr1b150-165 | 30  | 0  | 1    | 31   | 4    | 1 | 0.967742 |
| smallinvDAXr1b200-220 | 30  | 0  | 1    | 31   | 4    | 1 | 0.967742 |
| smallinvDAXr2b010-011 | 30  | 0  | 1    | 31   | 4    | 1 | 0.967742 |
| smallinvDAXr2b020-022 | 30  | 0  | 1    | 31   | 4    | 1 | 0.967742 |
| smallinvDAXr2b050-055 | 30  | 0  | 1    | 31   | 4    | 1 | 0.967742 |
| smallinvDAXr2b100-110 | 30  | 0  | 1    | 31   | 4    | 1 | 0.967742 |
| smallinvDAXr2b150-165 | 30  | 0  | 1    | 31   | 4    | 1 | 0.967742 |
| smallinvDAXr2b200-220 | 30  | 0  | 1    | 31   | 4    | 1 | 0.967742 |
| smallinvDAXr3b010-011 | 30  | 0  | 1    | 31   | 4    | 1 | 0.967742 |
| smallinvDAXr3b020-022 | 30  | 0  | 1    | 31   | 4    | 1 | 0.967742 |
| smallinvDAXr3b050-055 | 30  | 0  | 1    | 31   | 4    | 1 | 0.967742 |
| smallinvDAXr3b100-110 | 30  | 0  | 1    | 31   | 4    | 1 | 0.967742 |

---

|                       |    |    |     |     |     |    |          |
|-----------------------|----|----|-----|-----|-----|----|----------|
| smallinvDAXr3b150-165 | 30 | 0  | 1   | 31  | 4   | 1  | 0.967742 |
| smallinvDAXr3b200-220 | 30 | 0  | 1   | 31  | 4   | 1  | 0.967742 |
| smallinvDAXr4b010-011 | 30 | 0  | 1   | 31  | 4   | 1  | 0.967742 |
| smallinvDAXr4b020-022 | 30 | 0  | 1   | 31  | 4   | 1  | 0.967742 |
| smallinvDAXr4b050-055 | 30 | 0  | 1   | 31  | 4   | 1  | 0.967742 |
| smallinvDAXr4b100-110 | 30 | 0  | 1   | 31  | 4   | 1  | 0.967742 |
| smallinvDAXr4b150-165 | 30 | 0  | 1   | 31  | 4   | 1  | 0.967742 |
| smallinvDAXr4b200-220 | 30 | 0  | 1   | 31  | 4   | 1  | 0.967742 |
| smallinvDAXr5b010-011 | 30 | 0  | 1   | 31  | 4   | 1  | 0.967742 |
| smallinvDAXr5b020-022 | 30 | 0  | 1   | 31  | 4   | 1  | 0.967742 |
| smallinvDAXr5b050-055 | 30 | 0  | 1   | 31  | 4   | 1  | 0.967742 |
| smallinvDAXr5b100-110 | 30 | 0  | 1   | 31  | 4   | 1  | 0.967742 |
| smallinvDAXr5b150-165 | 30 | 0  | 1   | 31  | 4   | 1  | 0.967742 |
| smallinvDAXr5b200-220 | 30 | 0  | 1   | 31  | 4   | 1  | 0.967742 |
| squff025-030          | 0  | 25 | 750 | 775 | 780 | 1  | 0.967742 |
| squff025-025          | 0  | 25 | 625 | 650 | 650 | 1  | 0.961538 |
| squff010-025          | 0  | 10 | 250 | 260 | 275 | 1  | 0.961538 |
| fac2                  | 0  | 12 | 54  | 66  | 33  | 1  | 0.818182 |
| fac3                  | 0  | 12 | 54  | 66  | 33  | 1  | 0.818182 |
| fac1                  | 0  | 6  | 16  | 22  | 18  | 1  | 0.727273 |
| ex1223                | 0  | 4  | 7   | 11  | 13  | 5  | 0.636364 |
| st_e14                | 0  | 4  | 7   | 11  | 13  | 5  | 0.636364 |
| batchdes              | 0  | 9  | 10  | 19  | 19  | 2  | 0.526316 |
| cvxnonsep_pcon20r     | 10 | 0  | 29  | 39  | 20  | 19 | 0.512821 |
| cvxnonsep_pcon30r     | 15 | 0  | 44  | 59  | 30  | 29 | 0.508475 |
| cvxnonsep_pcon40r     | 20 | 0  | 59  | 79  | 40  | 39 | 0.506329 |
| cvxnonsep_psig40r     | 20 | 0  | 62  | 82  | 42  | 41 | 0.5      |
| cvxnonsep_normcon40r  | 20 | 0  | 60  | 80  | 41  | 40 | 0.5      |
| cvxnonsep_nsig40r     | 20 | 0  | 60  | 80  | 41  | 40 | 0.5      |
| cvxnonsep_psig30r     | 15 | 0  | 47  | 62  | 32  | 31 | 0.5      |
| cvxnonsep_normcon30r  | 15 | 0  | 45  | 60  | 31  | 30 | 0.5      |
| cvxnonsep_nsig30r     | 15 | 0  | 45  | 60  | 31  | 30 | 0.5      |
| cvxnonsep_psig20r     | 10 | 0  | 32  | 42  | 22  | 21 | 0.5      |
| cvxnonsep_normcon20r  | 10 | 0  | 30  | 40  | 21  | 20 | 0.5      |
| cvxnonsep_nsig20r     | 10 | 0  | 30  | 40  | 21  | 20 | 0.5      |
| st_miqp4              | 3  | 0  | 3   | 6   | 4   | 1  | 0.5      |

---

### 3 Detailed results

Details regarding the computational results are given in Table 2, showing the number of iterations, time and final gap for each test problem and method. The sign \* indicates that the time limit was exceeded. The gap reported is calculated as  $|LB - UB|/|LB|$  where  $LB$  and  $UB$  are the lower and upper bounds, respectively.

Table 2: Detailed results

| Instance              | OA       |            |         | L-OA     |            |         | Q-OA     |            |         |
|-----------------------|----------|------------|---------|----------|------------|---------|----------|------------|---------|
|                       | Time [s] | Iterations | Gap     | Time [s] | Iterations | Gap     | Time [s] | Iterations | Gap     |
| cvxnonsep_normcon40   | 900*     | 1856*      | 0.0123* | 900*     | 549*       | 0.0076* | 900*     | 535*       | 0.0075* |
| cvxnonsep_nsig40      | 360.863  | 663        | 0.0010  | 147.874  | 201        | 0.0010  | 121.554  | 144        | 0.0009  |
| cvxnonsep_pcon40      | 119.204  | 290        | 0.0010  | 112.095  | 158        | 0.0009  | 108.194  | 148        | 0.0006  |
| cvxnonsep_psig40      | 322.982  | 629        | 0.0010  | 168.723  | 210        | 0.0009  | 165.35   | 205        | 0.0009  |
| cvxnonsep_normcon30   | 900*     | 1134*      | 0.0016* | 538.453  | 455        | 0.0009  | 574.245  | 456        | 0.0006  |
| cvxnonsep_nsig30      | 381.401  | 915        | 0.0010  | 42.286   | 78         | 0.0009  | 48.464   | 83         | 0.0009  |
| cvxnonsep_pcon30      | 52.22    | 156        | 0.0010  | 41.269   | 72         | 0.0009  | 37.914   | 60         | 0.0008  |
| cvxnonsep_psig30      | 266.827  | 694        | 0.0009  | 98.742   | 160        | 0.0007  | 89.545   | 141        | 0.0009  |
| cvxnonsep_normcon20   | 104.701  | 311        | 0.0007  | 55.874   | 114        | 0.0010  | 49.974   | 102        | 0.0009  |
| cvxnonsep_nsig20      | 35.909   | 119        | 0.0009  | 26.007   | 50         | 0.0010  | 16.489   | 32         | 0.0009  |
| cvxnonsep_pcon20      | 19.183   | 63         | 0.0010  | 17.829   | 35         | 0.0009  | 13.166   | 25         | 0.0008  |
| cvxnonsep_psig20      | 113.183  | 379        | 0.0008  | 9.25     | 19         | 0.0010  | 2.967    | 7          | 0.0008  |
| du-opt                | 1.223    | 5          | 0.0005  | 4.066    | 9          | 0.0009  | 0.919    | 3          | 0.0000  |
| du-opt5               | 1.203    | 5          | 0.0002  | 2.541    | 6          | 0.0008  | 0.89     | 3          | 0.0001  |
| ex1223b               | 1.53     | 5          | 0.0000  | 2.225    | 5          | 0.0000  | 2.116    | 5          | 0.0000  |
| squff030-150          | 900*     | 88*        | 3.8776* | 900*     | 9*         | 1.7116* | 900*     | 13*        | 2.0196* |
| squff020-150          | 900*     | 98*        | 2.7303* | 900*     | 19*        | 1.4643* | 900*     | 42*        | 1.4822* |
| smallinvSNPr1b010-011 | 1.894    | 6          | 0.0000  | 4.122    | 8          | 0.0000  | 2.35     | 5          | 0.0000  |
| smallinvSNPr1b020-022 | 2.208    | 7          | 0.0000  | 4.63     | 9          | 0.0000  | 3.063    | 6          | 0.0000  |
| smallinvSNPr1b050-055 | 3.18     | 10         | 0.0000  | 6.182    | 11         | 0.0000  | 4.249    | 8          | 0.0000  |
| smallinvSNPr1b100-110 | 3.534    | 10         | 0.0000  | 7.272    | 13         | 0.0000  | 3.627    | 7          | 0.0008  |
| smallinvSNPr1b150-165 | 3.412    | 11         | 0.0007  | 5.254    | 10         | 0.0003  | 2.535    | 5          | 0.0003  |
| smallinvSNPr1b200-220 | 3.879    | 12         | 0.0006  | 5.994    | 12         | 0.0008  | 2.483    | 5          | 0.0008  |
| smallinvSNPr2b010-011 | 1.194    | 4          | 0.0000  | 2.965    | 6          | 0.0000  | 1.819    | 4          | 0.0000  |
| smallinvSNPr2b020-022 | 2.09     | 7          | 0.0000  | 4.63     | 9          | 0.0000  | 3.026    | 6          | 0.0000  |
| smallinvSNPr2b050-055 | 3.051    | 10         | 0.0000  | 5.514    | 10         | 0.0000  | 2.483    | 5          | 0.0000  |
| smallinvSNPr2b100-110 | 3.858    | 12         | 0.0003  | 5.91     | 11         | 0.0009  | 4.864    | 9          | 0.0007  |
| smallinvSNPr2b150-165 | 3.212    | 10         | 0.0004  | 5.389    | 10         | 0.0000  | 2.532    | 5          | 0.0004  |
| smallinvSNPr2b200-220 | 4.059    | 13         | 0.0004  | 6.539    | 12         | 0.0000  | 4.364    | 8          | 0.0000  |
| smallinvSNPr3b010-011 | 2.301    | 7          | 0.0000  | 3.181    | 6          | 0.0000  | 2.73     | 5          | 0.0000  |
| smallinvSNPr3b020-022 | 2.026    | 6          | 0.0000  | 3.673    | 7          | 0.0000  | 3.095    | 6          | 0.0000  |
| smallinvSNPr3b050-055 | 3.084    | 10         | 0.0000  | 5.639    | 10         | 0.0000  | 4.318    | 8          | 0.0000  |
| smallinvSNPr3b100-110 | 3.213    | 10         | 0.0006  | 4.998    | 9          | 0.0006  | 2.375    | 5          | 0.0006  |
| smallinvSNPr3b150-165 | 3.412    | 11         | 0.0000  | 5.286    | 10         | 0.0009  | 3.156    | 6          | 0.0007  |
| smallinvSNPr3b200-220 | 4.238    | 13         | 0.0000  | 6.489    | 12         | 0.0008  | 3.073    | 6          | 0.0001  |
| smallinvSNPr4b010-011 | 7.176    | 20         | 0.0000  | 9.898    | 16         | 0.0000  | 9.05     | 14         | 0.0000  |
| smallinvSNPr4b020-022 | 2.192    | 7          | 0.0000  | 3.523    | 7          | 0.0000  | 3.117    | 6          | 0.0000  |
| smallinvSNPr4b050-055 | 3.477    | 11         | 0.0000  | 5.572    | 10         | 0.0003  | 3.733    | 7          | 0.0001  |

|                       |         |      |         |         |      |         |         |      |         |
|-----------------------|---------|------|---------|---------|------|---------|---------|------|---------|
| smallinvSNPr4b100-110 | 3.686   | 12   | 0.0000  | 6.667   | 12   | 0.0000  | 4.724   | 9    | 0.0000  |
| smallinvSNPr4b150-165 | 4.373   | 14   | 0.0000  | 5.88    | 11   | 0.0002  | 3.64    | 7    | 0.0000  |
| smallinvSNPr4b200-220 | 3.351   | 11   | 0.0000  | 5.726   | 11   | 0.0000  | 3.077   | 6    | 0.0000  |
| smallinvSNPr5b010-011 | 4.618   | 14   | 0.0000  | 9.93    | 16   | 0.0000  | 7.46    | 12   | 0.0000  |
| smallinvSNPr5b020-022 | 2.841   | 9    | 0.0000  | 3.579   | 7    | 0.0000  | 3.15    | 6    | 0.0000  |
| smallinvSNPr5b050-055 | 3.479   | 11   | 0.0000  | 5.51    | 10   | 0.0000  | 2.443   | 5    | 0.0000  |
| smallinvSNPr5b100-110 | 2.751   | 8    | 0.0000  | 6.007   | 11   | 0.0000  | 3.657   | 7    | 0.0000  |
| smallinvSNPr5b150-165 | 4.421   | 14   | 0.0005  | 5.848   | 11   | 0.0008  | 3.119   | 6    | 0.0005  |
| smallinvSNPr5b200-220 | 3.785   | 12   | 0.0000  | 5.276   | 10   | 0.0000  | 3.023   | 6    | 0.0000  |
| squff030-100          | 900*    | 113* | 3.2451* | 900*    | 11*  | 1.9290* | 900*    | 48*  | 1.9899* |
| squff040-080          | 900*    | 123* | 3.4900* | 900*    | 10*  | 1.8806* | 900*    | 46*  | 1.8806* |
| squff015-080          | 900*    | 152* | 1.1302* | 900*    | 71*  | 1.2469* | 900*    | 75*  | 1.2660* |
| squff010-080          | 900*    | 181* | 0.1943* | 900*    | 121* | 0.2657* | 900*    | 132* | 0.2509* |
| squff015-060          | 900*    | 200* | 0.4635* | 900*    | 130* | 0.4371* | 900*    | 110* | 0.8024* |
| squff020-050          | 900*    | 190* | 1.1339* | 900*    | 88*  | 1.2583* | 900*    | 99*  | 1.3194* |
| squff025-040          | 900*    | 199* | 1.1967* | 900*    | 60*  | 1.5676* | 900*    | 98*  | 1.5676* |
| squff020-040          | 900*    | 231* | 0.3661* | 900*    | 112* | 0.5885* | 900*    | 114* | 0.6238* |
| squff010-040          | 238.235 | 159  | 0.0000  | 205.645 | 104  | 0.0001  | 206.827 | 101  | 0.0001  |
| smallinvDAXr1b010-011 | 11.335  | 35   | 0.0008  | 14.291  | 25   | 0.0001  | 12.691  | 22   | 0.0008  |
| smallinvDAXr1b020-022 | 12.043  | 38   | 0.0005  | 14.295  | 25   | 0.0005  | 10.002  | 17   | 0.0005  |
| smallinvDAXr1b050-055 | 14.076  | 43   | 0.0006  | 14.803  | 25   | 0.0005  | 10.445  | 18   | 0.0005  |
| smallinvDAXr1b100-110 | 16.173  | 51   | 0.0008  | 12.489  | 22   | 0.0009  | 6.212   | 11   | 0.0009  |
| smallinvDAXr1b150-165 | 14.641  | 46   | 0.0009  | 14.059  | 24   | 0.0009  | 3.493   | 7    | 0.0009  |
| smallinvDAXr1b200-220 | 14.787  | 47   | 0.0009  | 11.347  | 20   | 0.0008  | 4.671   | 9    | 0.0007  |
| smallinvDAXr2b010-011 | 12.981  | 40   | 0.0010  | 14.629  | 25   | 0.0001  | 12.975  | 22   | 0.0008  |
| smallinvDAXr2b020-022 | 12.396  | 39   | 0.0005  | 12.641  | 22   | 0.0004  | 9.675   | 17   | 0.0005  |
| smallinvDAXr2b050-055 | 13.484  | 42   | 0.0008  | 12.23   | 22   | 0.0009  | 10.662  | 18   | 0.0005  |
| smallinvDAXr2b100-110 | 13.918  | 44   | 0.0010  | 12.966  | 22   | 0.0008  | 5.869   | 11   | 0.0010  |
| smallinvDAXr2b150-165 | 16.614  | 51   | 0.0010  | 10.966  | 19   | 0.0010  | 3.617   | 7    | 0.0009  |
| smallinvDAXr2b200-220 | 16.22   | 49   | 0.0009  | 11.232  | 20   | 0.0006  | 4.741   | 9    | 0.0007  |
| smallinvDAXr3b010-011 | 12.487  | 38   | 0.0010  | 18.347  | 31   | 0.0007  | 12.795  | 22   | 0.0008  |
| smallinvDAXr3b020-022 | 12.574  | 38   | 0.0005  | 13.228  | 23   | 0.0009  | 9.789   | 17   | 0.0005  |
| smallinvDAXr3b050-055 | 14.313  | 44   | 0.0006  | 14.523  | 25   | 0.0008  | 10.837  | 18   | 0.0005  |
| smallinvDAXr3b100-110 | 15.528  | 47   | 0.0009  | 13.817  | 24   | 0.0006  | 7.497   | 13   | 0.0010  |
| smallinvDAXr3b150-165 | 15.892  | 48   | 0.0010  | 11.882  | 21   | 0.0009  | 4.153   | 8    | 0.0009  |
| smallinvDAXr3b200-220 | 16.602  | 52   | 0.0009  | 11.495  | 20   | 0.0006  | 5.817   | 10   | 0.0009  |
| smallinvDAXr4b010-011 | 11.106  | 35   | 0.0007  | 12.699  | 22   | 0.0007  | 13.449  | 22   | 0.0008  |
| smallinvDAXr4b020-022 | 13.016  | 40   | 0.0005  | 14.626  | 25   | 0.0006  | 10.425  | 17   | 0.0005  |
| smallinvDAXr4b050-055 | 15.155  | 45   | 0.0009  | 13.019  | 23   | 0.0006  | 10.559  | 18   | 0.0005  |
| smallinvDAXr4b100-110 | 14.402  | 44   | 0.0009  | 11.205  | 20   | 0.0009  | 7.405   | 13   | 0.0010  |
| smallinvDAXr4b150-165 | 15.547  | 48   | 0.0010  | 11.21   | 20   | 0.0009  | 4.091   | 8    | 0.0009  |
| smallinvDAXr4b200-220 | 14.571  | 44   | 0.0008  | 11.565  | 21   | 0.0009  | 6.78    | 11   | 0.0009  |

|                       |         |      |         |         |      |         |         |      |         |
|-----------------------|---------|------|---------|---------|------|---------|---------|------|---------|
| smallinvDAXr5b010-011 | 12.773  | 40   | 0.0006  | 12.884  | 22   | 0.0007  | 14.052  | 22   | 0.0008  |
| smallinvDAXr5b020-022 | 11.054  | 34   | 0.0005  | 10.71   | 19   | 0.0005  | 10.791  | 18   | 0.0005  |
| smallinvDAXr5b050-055 | 13.882  | 42   | 0.0008  | 13.168  | 23   | 0.0010  | 9.071   | 15   | 0.0008  |
| smallinvDAXr5b100-110 | 14.225  | 44   | 0.0009  | 11.124  | 20   | 0.0007  | 7.497   | 13   | 0.0009  |
| smallinvDAXr5b150-165 | 17.016  | 51   | 0.0010  | 10.465  | 19   | 0.0010  | 6.072   | 11   | 0.0009  |
| smallinvDAXr5b200-220 | 15.207  | 47   | 0.0010  | 10.104  | 18   | 0.0009  | 7.396   | 11   | 0.0009  |
| squff025-030          | 900*    | 266* | 0.4438* | 900*    | 136* | 0.6127* | 900*    | 150* | 0.6333* |
| squff025-025          | 900*    | 267* | 0.4102* | 900*    | 118* | 0.6177* | 900*    | 133* | 0.7265* |
| squff010-025          | 132.307 | 145  | 0.0000  | 116.474 | 94   | 0.0007  | 123.704 | 94   | 0.0000  |
| fac2                  | 2.544   | 7    | 0.0000  | 3.546   | 7    | 0.0000  | 3.108   | 6    | 0.0000  |
| fac3                  | 2.347   | 7    | 0.0000  | 3.331   | 7    | 0.0000  | 2.965   | 6    | 0.0000  |
| fac1                  | 1.469   | 3    | 0.0000  | 1.171   | 3    | 0.0000  | 1.199   | 3    | 0.0000  |
| ex1223                | 1.483   | 5    | 0.0000  | 2.181   | 5    | 0.0000  | 2.147   | 5    | 0.0000  |
| st_e14                | 1.456   | 5    | 0.0000  | 2.174   | 5    | 0.0000  | 2.154   | 5    | 0.0000  |
| batchdes              | 0.605   | 2    | 0.0000  | 0.612   | 2    | 0.0000  | 0.599   | 2    | 0.0000  |
| cvxnonsep_pcon20r     | 1.816   | 7    | 0.0002  | 4.207   | 9    | 0.0003  | 1.942   | 5    | 0.0008  |
| cvxnonsep_pcon30r     | 1.899   | 7    | 0.0002  | 4.474   | 9    | 0.0006  | 3.191   | 7    | 0.0007  |
| cvxnonsep_pcon40r     | 1.607   | 6    | 0.0008  | 4.99    | 10   | 0.0006  | 4.484   | 9    | 0.0010  |
| cvxnonsep_psig40r     | 1.273   | 5    | 0.0007  | 4.853   | 9    | 0.0003  | 2.215   | 5    | 0.0003  |
| cvxnonsep_normcon40r  | 3.112   | 7    | 0.0000  | 5.694   | 9    | 0.0007  | 2.974   | 5    | 0.0007  |
| cvxnonsep_nsig40r     | 2.341   | 8    | 0.0005  | 7.702   | 13   | 0.0007  | 2.589   | 6    | 0.0007  |
| cvxnonsep_psig30r     | 1.855   | 7    | 0.0003  | 5.055   | 10   | 0.0002  | 2.528   | 6    | 0.0008  |
| cvxnonsep_normcon30r  | 3.203   | 9    | 0.0000  | 6.422   | 12   | 0.0005  | 3.577   | 7    | 0.0009  |
| cvxnonsep_nsig30r     | 1.645   | 5    | 0.0007  | 4.95    | 10   | 0.0006  | 2.39    | 6    | 0.0007  |
| cvxnonsep_psig20r     | 1.831   | 6    | 0.0006  | 7.545   | 15   | 0.0008  | 2.486   | 6    | 0.0008  |
| cvxnonsep_normcon20r  | 1.913   | 6    | 0.0000  | 5.456   | 11   | 0.0000  | 4.562   | 10   | 0.0009  |
| cvxnonsep_nsig20r     | 1.449   | 5    | 0.0009  | 4.906   | 10   | 0.0006  | 2.211   | 5    | 0.0006  |
| st_miqp4              | 0.386   | 2    | 0.0000  | 0.369   | 2    | 0.0000  | 0.375   | 2    | 0.0000  |
| ibs2                  | 900*    | 431* | 0.0054* | 900*    | 41*  | 0.1093* | 103.888 | 16   | 0.0010  |
